# Supplementary material for: Calibrating adsorptive and reactive losses of monoterpenes and sesquiterpenes in dynamic chambers using deuterated surrogates
Source: Copernicus journal article supplement (doi:10.5194/amt-2024-170), 2025-01-15
Supplement: Supplementary file 1 [file amt-2024-170-supplement.pdf]

*Supplement of*

**Calibrating adsorptive and reactive losses of monoterpenes and sesquiterpenes in dynamic chambers using deuterated surrogates**

**Jianqiang Zeng et al.**

Correspondence: Xinming Wang (wangxm@gig.ac.cn) and Yanli Zhang (zhang\_y186@gig.ac.cn)

## Text S1

As shown in Fig. S1, the dry air was divided to two paths, one with flow rate of  $F_1$  ( $\text{L min}^{-1}$ ) passed through an ultraviolet lamp (SOG-2, Analytik Jena, USA) to generate  $\text{O}_3$  with targeted mixing ratio, and another with flow rate of  $F_2$  ( $\text{L min}^{-1}$ ) passed through a humidifier, then they were mixed and the total flow rate of  $F_1$  and  $F_2$  was maintained at  $9 \text{ L min}^{-1}$ , the final humidity of the mixed main airflow was adjusted by the ratio of  $F_1$  and  $F_2$ . After that, the standard gas mixtures with flow rate of  $F_3$  ( $\leq 100 \text{ mL min}^{-1}$ ) were released into the main airflow and mixed again through a FEP Teflon tube with length of 3 m, then the mixed airflow was introduced into the chamber. All flow rates were controlled by calibrated mass flow controllers and all tubes were FEP Teflon materials in Fig. S1. The outer chamber body was intertwined by rubber hose with water circulating in it, the temperature of the circulating water was controlled by a water bath; this way, the temperature in the chamber can be controlled at nearly constant value with deviation of smaller than  $0.5 \text{ }^\circ\text{C}$ . The concentrations of MTs and SQTs were measured continuously by a PTR-ToF-MS (PTR-ToF-MS 2000, Ionicon Analytik GmbH, Innsbruck, Austria; Wang et al., 2014), and the mixing ratio of  $\text{O}_3$  was monitored by an ozone analyzer (Mode 49i, Thermo Fisher Scientific, USA). Temperature and humidity inside the chamber were monitored by sensors (HC2A-S, Rotronic, Switzerland). After the concentrations of MTs and SQTs in the chamber reached steady state, offline samples were collected simultaneously from inlet ( $C_0$ ) and outlet ( $C_1$ ) by commercial adsorbent cartridges (Tenax TA/Carbograph 5TD, Markes International Ltd, UK) connected onto a portable dual-channel sampler (ZC-QL, Zhejiang Hengda Instrumentation Ltd., China) at a rate of  $200 \text{ mL min}^{-1}$  for 5 min. Therefore, the recovery was expressed as  $C_1 / C_0$  (%). Ozone scrubbers (Zeng et al., 2022a) were used only during the experiment of ozone effect (Fig. S1). Additionally, we tested whether the ozone scrubber will adsorb MTs and SQTs, the results showed that most MTs and SQTs had good recoveries of  $92 \pm 2\%$  to  $103 \pm 1\%$ . Linalool, for an exception, had obvious loss with recovery of only 40% (Fig. S2). Therefore, linalool did not include in the subsection of ozone effect.

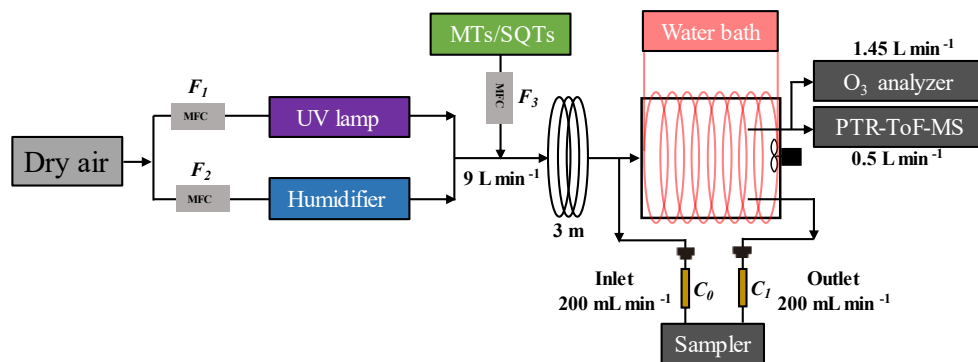

**Figure S1.** Schematic diagram of chamber evaluation experiments.

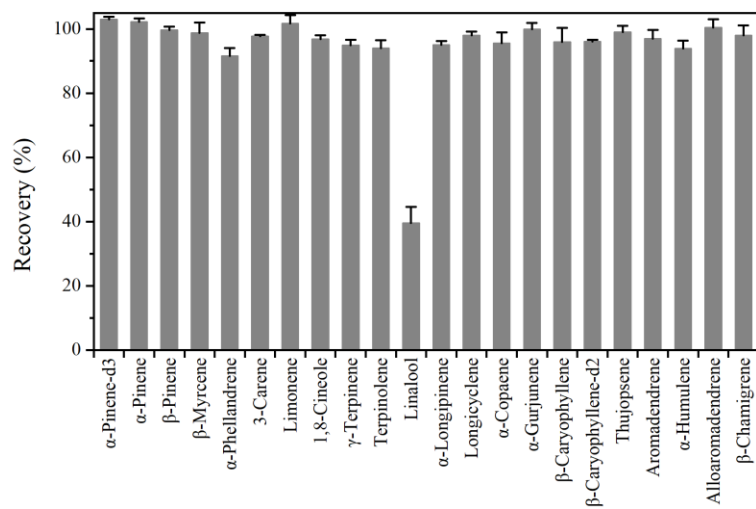

**Figure S2.** The effect of O<sub>3</sub> scrubber on the recoveries of MTs and SQTs.

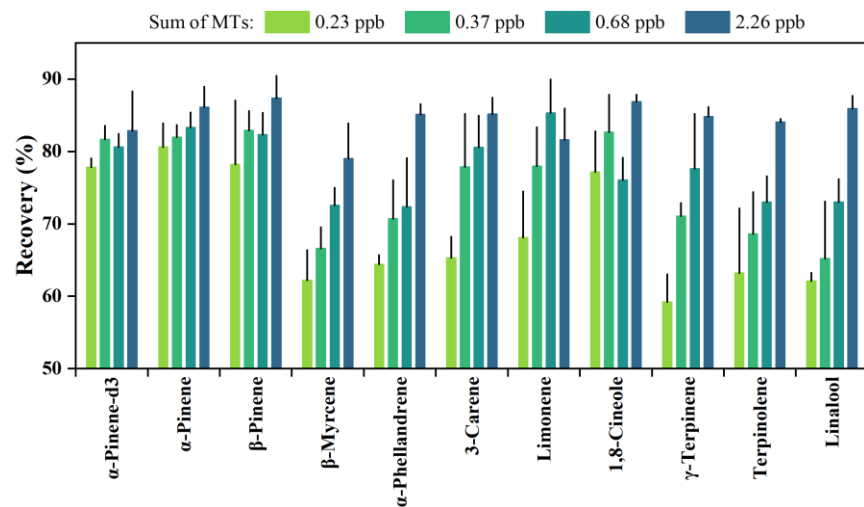

**Figure S3.** Recoveries of MT monomers under different concentration levels.

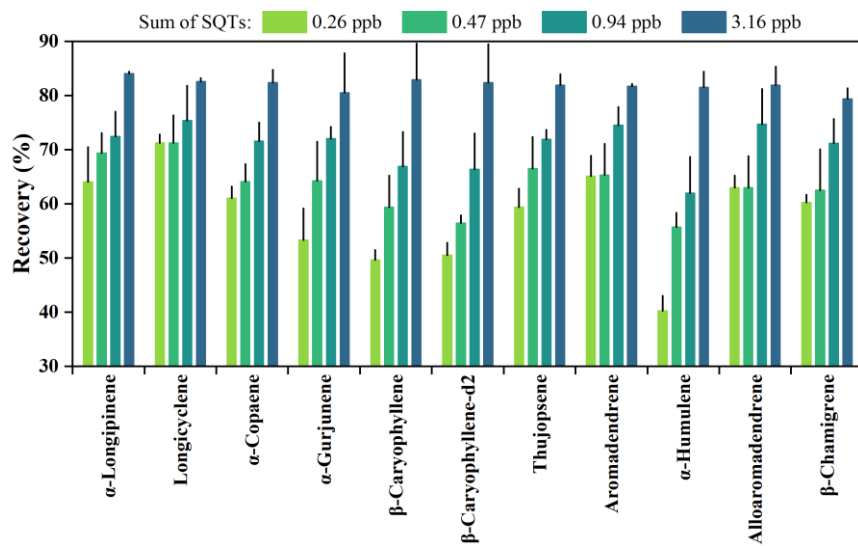

**Figure S4.** Recoveries of SQT monomers under different concentration levels.

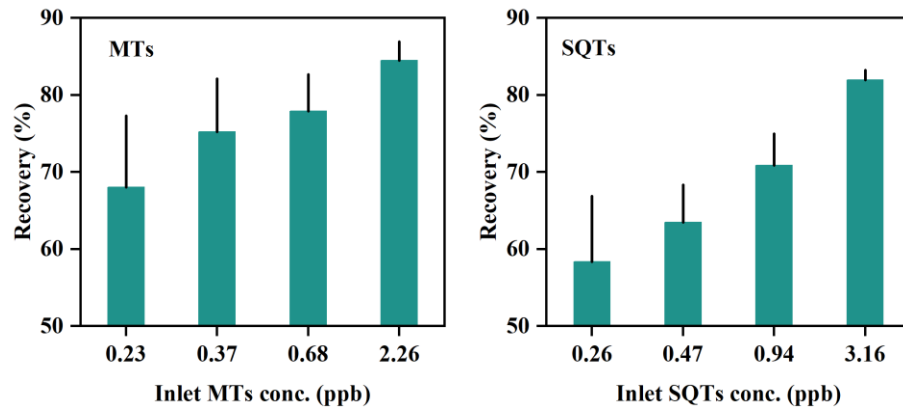

**Figure S5.** The average recoveries of MTs and SQTs under different concentration levels.

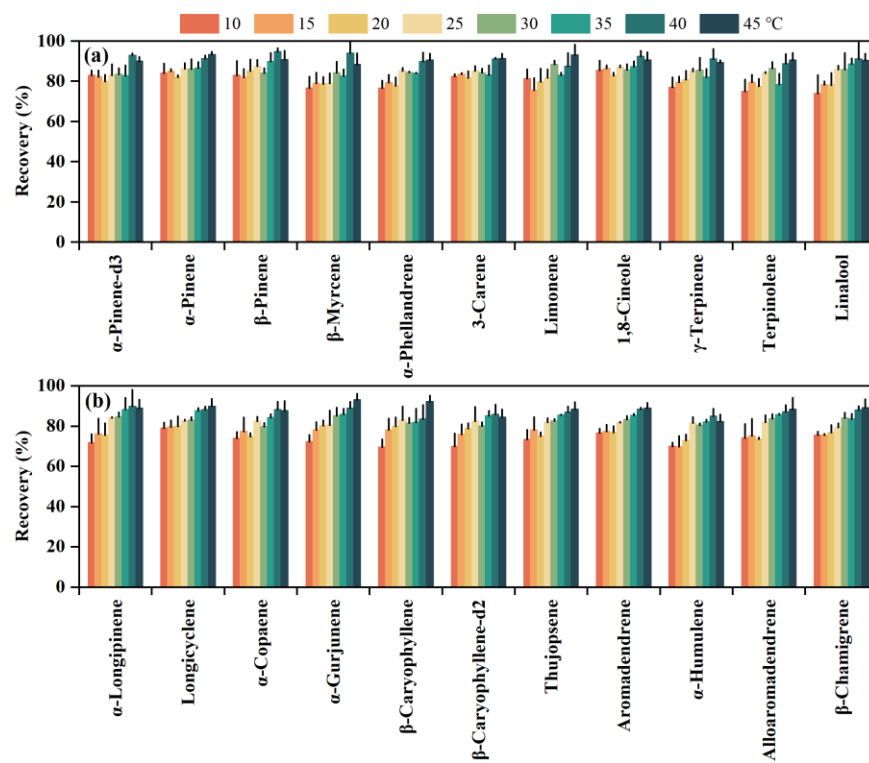

**Figure S6.** Recoveries of different MT (a) and SQT (b) monomers under different temperatures among high concentration regime.



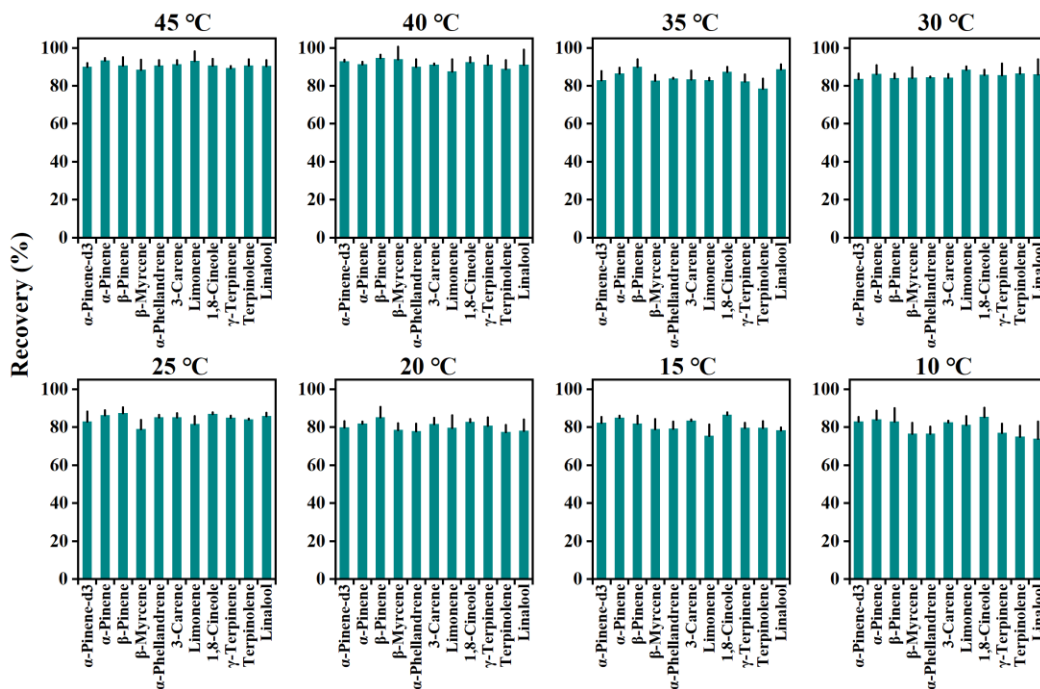

**Figure S7.** Recoveries of different MT monomers under different temperatures among high concentration regime.

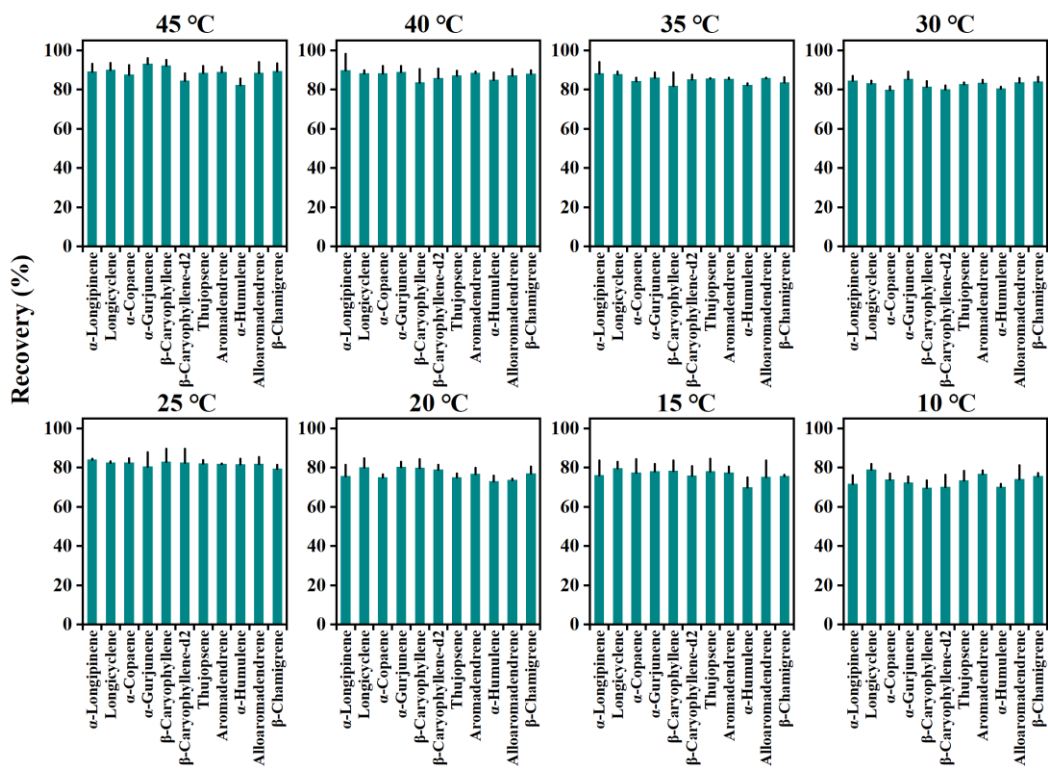

**Figure S8.** Recoveries of different SQT monomers under different temperatures among high concentration regime.

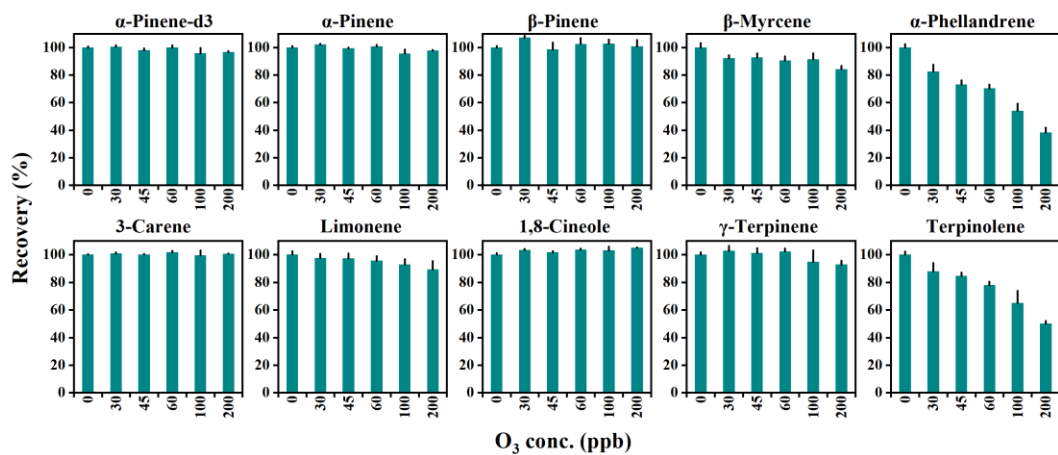

Figure S9. Reactive losses of different MT monomers under different O<sub>3</sub> mixing ratios.

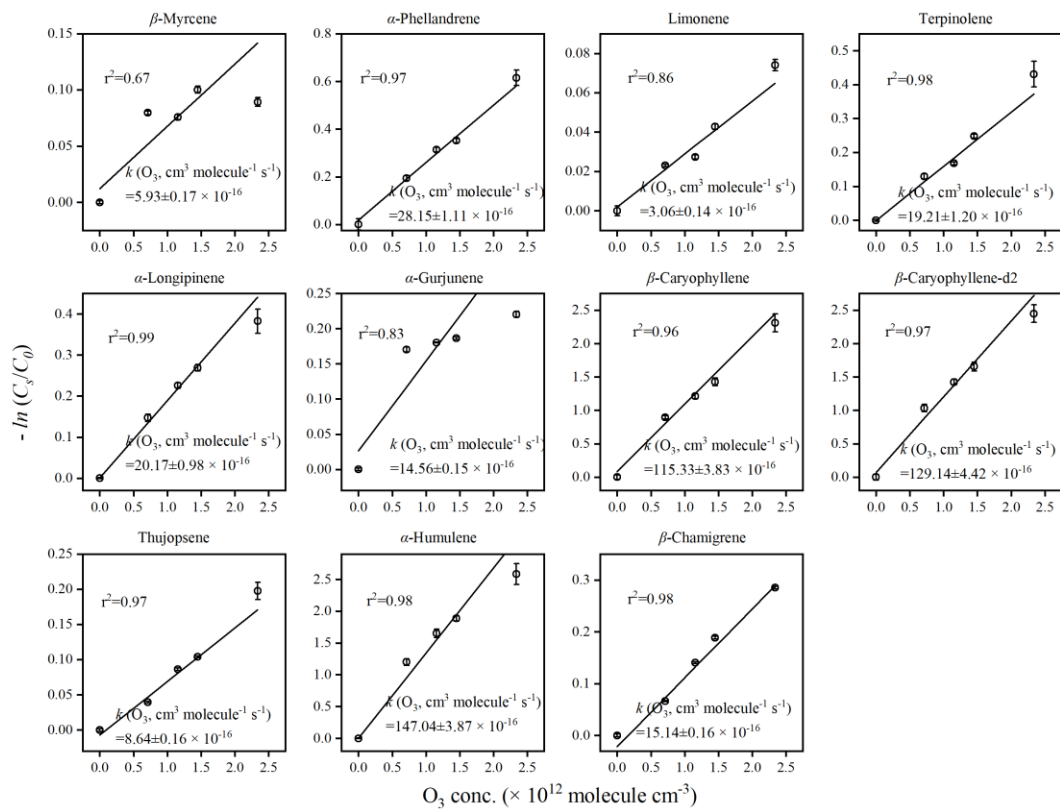

Figure S10. The rate constants of different MT and SQT monomers with ozone.

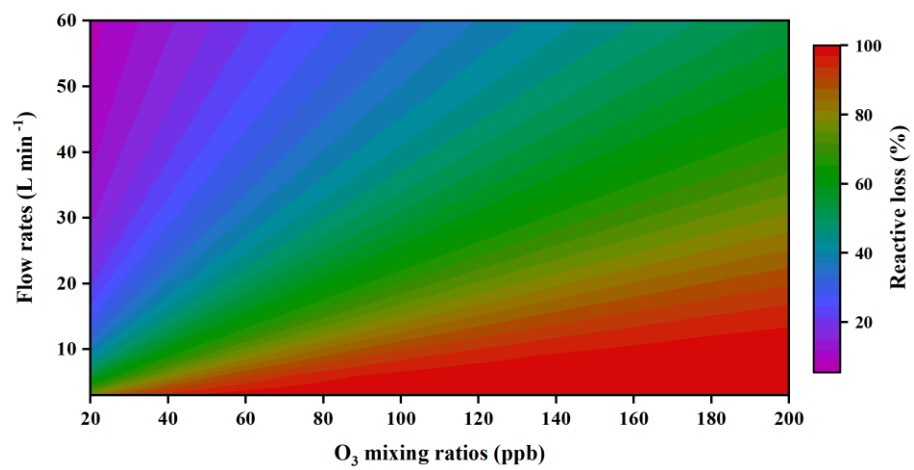

**Figure S11.** Reactive losses of  $\beta$ -caryophyllene under different ozone mixing ratios and flow rates.

**Table S1.** The information of monoterpene and sesquiterpene standards.

| Compounds                 | CAS No.      | Chemical formula                               | Molecular weight (g mol <sup>-1</sup> ) | Purity  | Supplier      |
|---------------------------|--------------|------------------------------------------------|-----------------------------------------|---------|---------------|
| $\alpha$ -Pinene-d3       | 75352-01-1   | C <sub>10</sub> H <sub>13</sub> D <sub>3</sub> | 139.23                                  | >95 %   | TRC           |
| $\alpha$ -Pinene          | 7785-26-4    | C <sub>10</sub> H <sub>16</sub>                | 136.23                                  | >95 %   | Sigma-Aldrich |
| $\beta$ -Pinene           | 18172-67-3   | C <sub>10</sub> H <sub>16</sub>                | 136.23                                  | >98.5 % | Sigma-Aldrich |
| $\beta$ -Myrcene          | 123-35-3     | C <sub>10</sub> H <sub>16</sub>                | 136.23                                  | >90 %   | TRC           |
| $\alpha$ -Phellandrene    | 4221-98-1    | C <sub>10</sub> H <sub>16</sub>                | 136.23                                  | >95 %   | Sigma-Aldrich |
| 3-Carene                  | 13466-78-9   | C <sub>10</sub> H <sub>16</sub>                | 136.23                                  | >95 %   | Sigma-Aldrich |
| Limonene                  | 5989-27-5    | C <sub>10</sub> H <sub>16</sub>                | 136.23                                  | >95 %   | Sigma-Aldrich |
| 1,8-Cineole               | 470-82-6     | C <sub>10</sub> H <sub>18</sub> O              | 154.25                                  | >99 %   | Sigma-Aldrich |
| $\gamma$ -Terpinene       | 97-85-4      | C <sub>10</sub> H <sub>16</sub>                | 136.23                                  | >95 %   | Sigma-Aldrich |
| Terpinolene               | 586-62-9     | C <sub>10</sub> H <sub>16</sub>                | 136.23                                  | >97 %   | Fluka         |
| Linalool                  | 78-70-6      | C <sub>10</sub> H <sub>18</sub> O              | 154.25                                  | >97 %   | Sigma-Aldrich |
| $\alpha$ -Longipinene     | 5989-08-2    | C <sub>15</sub> H <sub>24</sub>                | 204.35                                  | >99 %   | Sigma-Aldrich |
| Longicyclene              | 1137-12-8    | C <sub>15</sub> H <sub>24</sub>                | 204.35                                  | >95 %   | Sigma-Aldrich |
| $\alpha$ -Copaene         | 3856-25-5    | C <sub>15</sub> H <sub>24</sub>                | 204.35                                  | >95 %   | Fluka         |
| $\alpha$ -Gurjunene       | 489-40-7     | C <sub>15</sub> H <sub>24</sub>                | 204.35                                  | >97 %   | Sigma-Aldrich |
| $\beta$ -Caryophyllene    | 87-44-5      | C <sub>15</sub> H <sub>24</sub>                | 204.35                                  | >98.5 % | Sigma-Aldrich |
| $\beta$ -Caryophyllene-d2 | 2006272-96-2 | C <sub>15</sub> H <sub>22</sub> D <sub>2</sub> | 206.37                                  | >95 %   | TLC           |
| Thujopsene                | 470-40-6     | C <sub>15</sub> H <sub>24</sub>                | 204.35                                  | >97 %   | Sigma-Aldrich |
| Aromadendrene             | 25246-27-9   | C <sub>15</sub> H <sub>24</sub>                | 204.35                                  | >98 %   | Sigma-Aldrich |
| $\alpha$ -Humulene        | 6753-98-6    | C <sub>15</sub> H <sub>24</sub>                | 204.35                                  | >96 %   | Sigma-Aldrich |
| Alloaromadendrene         | 489-39-4     | C <sub>15</sub> H <sub>24</sub>                | 204.35                                  | >97 %   | Sigma-Aldrich |
| $\beta$ -Chamigrene       | 18431-82-8   | C <sub>15</sub> H <sub>24</sub>                | 204.35                                  | >90 %   | Sigma-Aldrich |

**Table S2.** Method detection limits and measurement precisions of monoterpenes and sesquiterpenes.

| Compounds                 | m/z | Chemical formula                               | MDL (ng m <sup>-3</sup> ) | RSD (%) |
|---------------------------|-----|------------------------------------------------|---------------------------|---------|
| $\alpha$ -Pinene-d3       | 96  | C <sub>10</sub> H <sub>13</sub> D <sub>3</sub> | 6                         | 4.5 %   |
| $\alpha$ -Pinene          | 93  | C <sub>10</sub> H <sub>16</sub>                | 8                         | 4.5%    |
| $\beta$ -Pinene           | 93  | C <sub>10</sub> H <sub>16</sub>                | 38                        | 3.9%    |
| $\beta$ -Myrcene          | 93  | C <sub>10</sub> H <sub>16</sub>                | 92                        | 2.3%    |
| $\alpha$ -Phellandrene    | 93  | C <sub>10</sub> H <sub>16</sub>                | 20                        | 3.0%    |
| 3-Carene                  | 93  | C <sub>10</sub> H <sub>16</sub>                | 10                        | 2.8%    |
| Limonene                  | 93  | C <sub>10</sub> H <sub>16</sub>                | 36                        | 4.8%    |
| 1,8-Cineole               | 93  | C <sub>10</sub> H <sub>18</sub> O              | 8                         | 3.8%    |
| $\gamma$ -Terpinene       | 93  | C <sub>10</sub> H <sub>16</sub>                | 38                        | 3.8%    |
| Terpinolene               | 93  | C <sub>10</sub> H <sub>16</sub>                | 30                        | 2.7%    |
| Linalool                  | 93  | C <sub>10</sub> H <sub>18</sub> O              | 28                        | 3.6%    |
| $\alpha$ -Longipinene     | 93  | C <sub>15</sub> H <sub>24</sub>                | 50                        | 2.7%    |
| Longicyclene              | 93  | C <sub>15</sub> H <sub>24</sub>                | 10                        | 1.5%    |
| $\alpha$ -Copaene         | 93  | C <sub>15</sub> H <sub>24</sub>                | 16                        | 3.3%    |
| $\alpha$ -Gurjunene       | 93  | C <sub>15</sub> H <sub>24</sub>                | 2                         | 3.4%    |
| $\beta$ -Caryophyllene    | 204 | C <sub>15</sub> H <sub>24</sub>                | 92                        | 2.0%    |
| $\beta$ -Caryophyllene-d2 | 206 | C <sub>15</sub> H <sub>22</sub> D <sub>2</sub> | 28                        | 2.0 %   |
| Thujopsene                | 93  | C <sub>15</sub> H <sub>24</sub>                | 20                        | 1.1%    |
| Aromadendrene             | 93  | C <sub>15</sub> H <sub>24</sub>                | 6                         | 2.6%    |
| $\alpha$ -Humulene        | 93  | C <sub>15</sub> H <sub>24</sub>                | 2                         | 1.7%    |
| Alloaromadendrene         | 93  | C <sub>15</sub> H <sub>24</sub>                | 8                         | 2.4%    |
| $\beta$ -Chamigrene       | 93  | C <sub>15</sub> H <sub>24</sub>                | 4                         | 1.8%    |

## References

- Wang, X., Liu, T., Bernard, F., Ding, X., Wen, S., Zhang, Y., Zhang, Z., He, Q., Lü, S., Chen, J., Saunders, S., and Yu, J.: Design and characterization of a smog chamber for studying gas-phase chemical mechanisms and aerosol formation, *Atmos. Meas. Tech.*, 7, 301-313, <https://doi.org/10.5194/amt-7-301-2014>, 2014.
- Zeng, J., Zhang, Y., Zhang, H., Song, W., Wu, Z., and Wang, X.: Design and characterization of a semi-open dynamic chamber for measuring biogenic volatile organic compound (BVOC) emissions from plants, *Atmos. Meas. Tech.*, 15, 79-93, <https://doi.org/10.5194/amt-15-79-2022>, 2022a.
